# Supplementary material
Source: Springer Nature journal article supplement (https://www.springermedizin.de/resource/supplementary/12992_2013_205_MOESM2_ESM.pdf/9616686)
Supplement: MOESM2 [file 9616686]

Box 2 – List of community services available across North Wales

| <b>Pregnancy</b>                                                                                                                                                                                                        | <b>Children</b>                                                                                                                                                                                                                                                                                                                                                | <b>Adult</b>                                                                                                                                                                                                                                                                                                                | <b>Social</b>                                                                                                                                                                                                                                                                                                                                                   | <b>3<sup>rd</sup> Sector Teams</b>                                                                                                                                                                   |
|-------------------------------------------------------------------------------------------------------------------------------------------------------------------------------------------------------------------------|----------------------------------------------------------------------------------------------------------------------------------------------------------------------------------------------------------------------------------------------------------------------------------------------------------------------------------------------------------------|-----------------------------------------------------------------------------------------------------------------------------------------------------------------------------------------------------------------------------------------------------------------------------------------------------------------------------|-----------------------------------------------------------------------------------------------------------------------------------------------------------------------------------------------------------------------------------------------------------------------------------------------------------------------------------------------------------------|------------------------------------------------------------------------------------------------------------------------------------------------------------------------------------------------------|
| Community midwife<br>Health visitor<br>Midwifery support<br>Specialist nurses:<br>Learning disability;<br>Substance misuse;<br>Community Psychiatry<br>Specialist midwife<br>Drug and alcohol team<br>Asylum specialist | Social workers<br>Safeguarding teams<br>Child mental health<br>teams<br>Community<br>paediatrician<br>Childcare support<br>workers<br>Specialist nurses:<br>Community Diana;<br>Neonatal; Diabetes;<br>Nursery; Art therapy;<br>Specialist Behavioural;<br>Occupational therapy;<br>Youth justice service<br>Play workers<br>Speech and Language<br>therapists | Specialist nurses:<br>Tissue viability;<br>Alzheimer's;<br>Parkinson's;<br>Diabetes; Stroke;<br>Heart failure;<br>Respiratory;<br>Oxygen<br>assessment; Home<br>ventilation;<br>Immunisation<br>Practice Nurses<br>Vulnerable group<br>teams<br>Crisis intervention<br>teams<br>Early discharge<br>teams<br>Contact tracing | Home carers<br>Education<br>psychologists<br>Youth workers<br>Language and play<br>support workers (LAP)<br>Numbers and play<br>support workers (NAP)<br>Families First<br>Intensive family<br>support services<br>Financial advisors<br>Debt and benefit<br>maximization teams<br>Peer parents<br>Community support<br>officers<br>Communities First<br>worker | Flying start<br>Health promotion<br>worker<br>User involvement<br>Counselling services –<br>Bernardo's / NSPCC /<br>NCH Action 4 Children<br>Advocacy services<br>Homestart<br>Breastfeeding support |
